# Supplementary figures and images for: Impact of Online Weight Management With Peer Coaching on Physical Activity Levels of Adults With Serious Mental Illness
Source: Atypon-hosted journal article supplement (doi:10.1176/appi.ps.201700391), 2018-07-25

CONSORT Diagram for Randomized Controlled Trials Depicting Participant Flow.

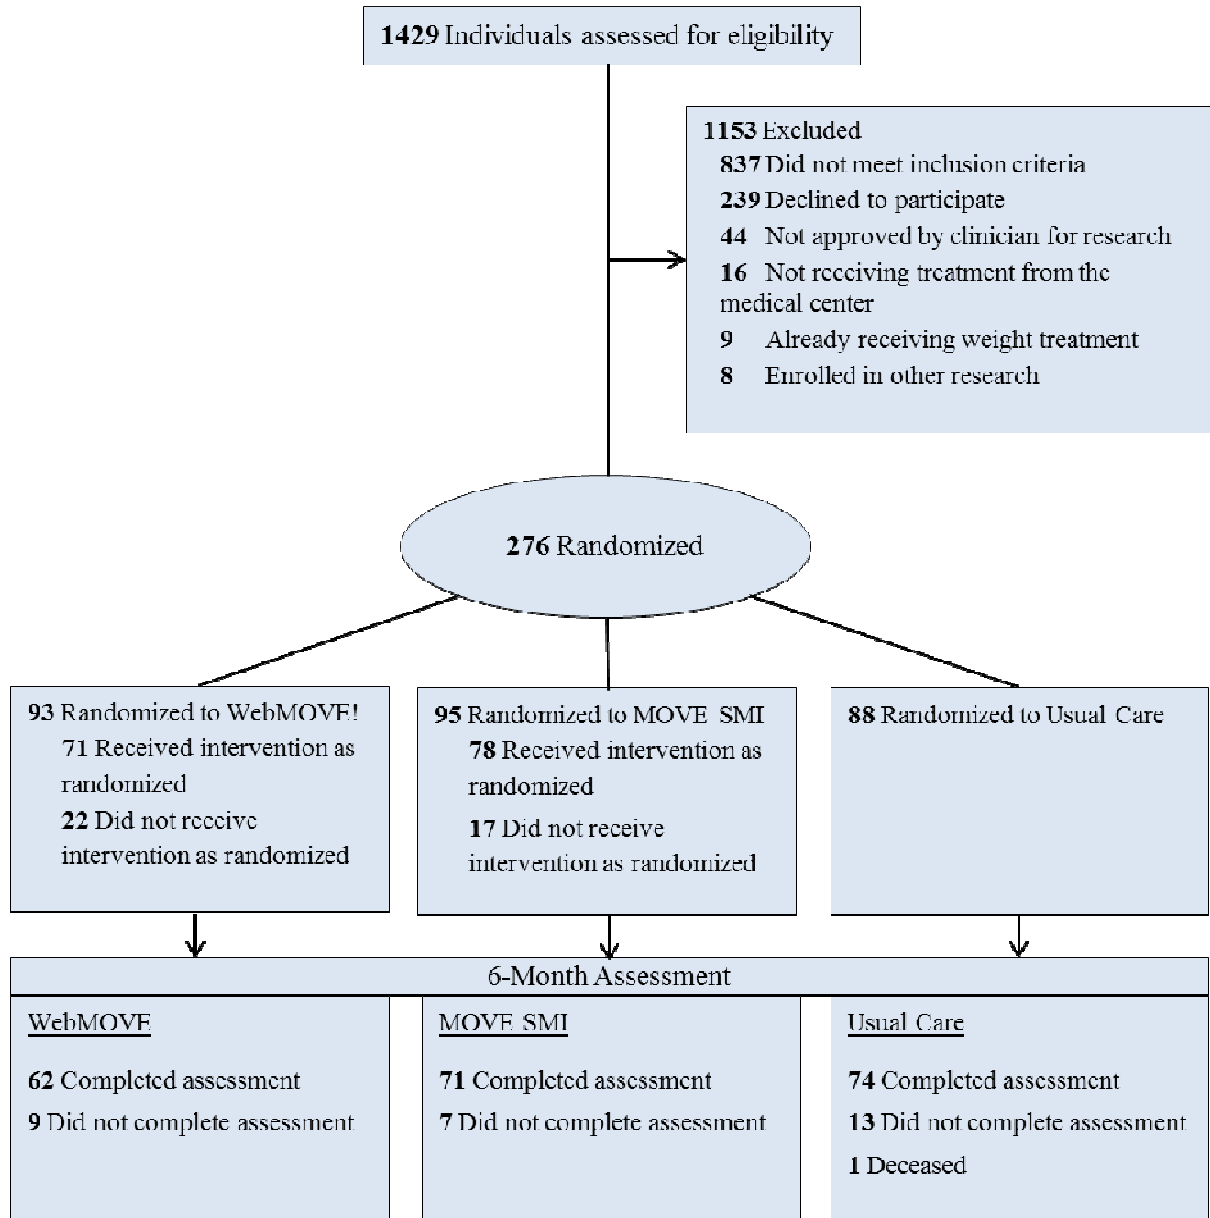

Supplement: appi.ps.201700391.ds001.pdf [file appi.ps.201700391.ds001.pdf]
